# Supplementary material for: Zebrafish models for human FKRP muscular dystrophies
Source: PubMed Central journal article supplement — Hum Mol Genet. 2009 Dec 1;19(4):623–33. doi: 10.1093/hmg/ddp528 (PMC2807370; doi:10.1093/hmg/ddp528), 2009-12-01
Supplement: ddp528_1.pdf [file ddp528_1.pdf]

## Supplemental Data 1

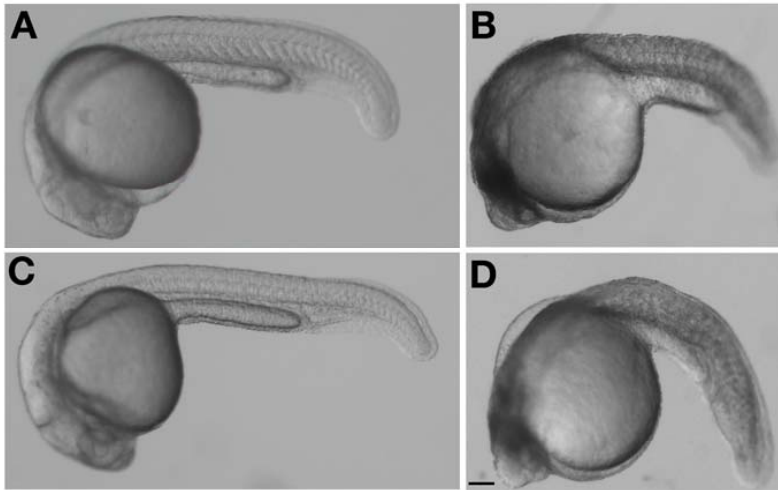

Supplemental data 1. FKRP morphants at 1 dpf. (A): Control MO1 injected fish. (B) FKRP MO1 injected fish. (C): Control MO2 injected fish. (D) FKRP MO2 injected fish. Bar: 100  $\mu\text{m}$ . At 1 dpf, following injection of FKRP MOs, both FKRP morphant 1 and 2 embryos have abnormal formation of head and eyes. The organization of muscle is abnormal in both FKRP morphants compared to controls. FKRP morphants display alterations in somite morphology observed as curved somite boundaries.

## Supplemental Data 2

### MO1 & 2 injected fish (1 day)

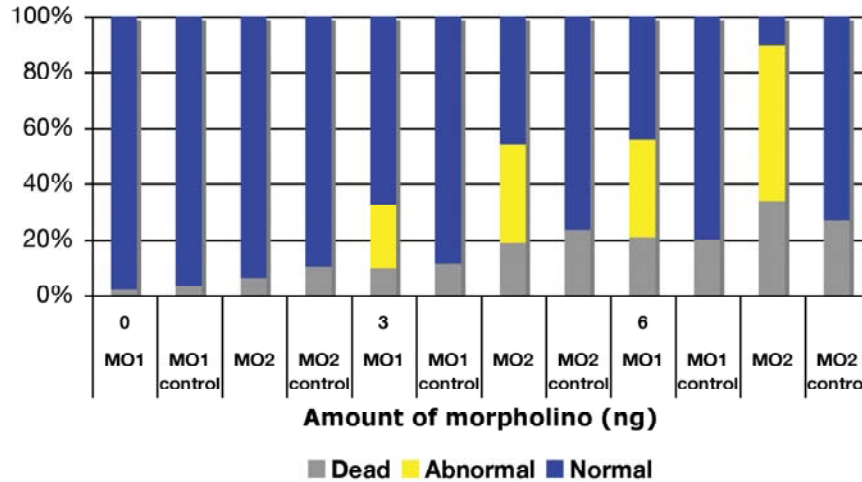

### MO1& 2 injected fish (4 days)

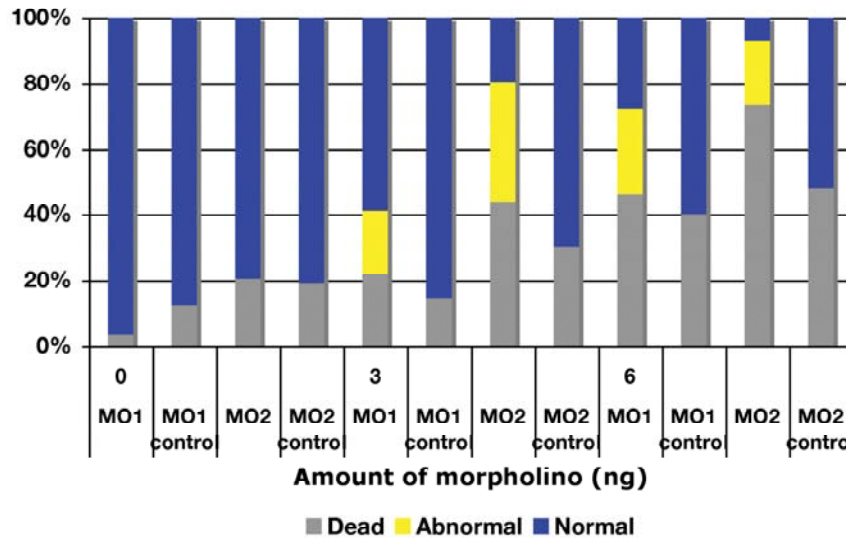

Supplemental data 2. Histogram of the percentage of dead affected fish of morphants and affected fish with injection of MO1 and MO2 and control MO1 and MO2 (3 ng and 6 ng). Blue bar shows normal %, yellow shows affected % and gray shows dead fish %.

### Supplemental Data 3

|                             |                             |
|-----------------------------|-----------------------------|
| Fish FKRP sequence primers  |                             |
| F1                          | CCATAATGCGTATCAGTTTTTGCCAGG |
| R1                          | TCTTCAAATTCCTGAACCAG        |
| F2                          | GATGGGTAACCTCGTTGGTG        |
| R2                          | CCGAATGAGACGCTCAACTT        |
| F3                          | CGAGTTCAACGTGCAGACAG        |
| R3                          | CCAGGAGTTTGACCTTCCAG        |
| F4                          | TTCTTATTCGCACCGAGGAC        |
| R4                          | CTCTCTGAGGGCACGTAAGC        |
| F5                          | ATGTTTCGGGACAGTTCGAG        |
| R5                          | TCCATTACGGGGTAAAATG         |
| F6                          | CCGTGTTTCAGTACAGCGAAA       |
| R6                          | TTCCCAAACAATGCACACAC        |
| Human FKRP sequence primers |                             |
| F1                          | CCAGCTAGCCCCAGACTTC         |
| R1                          | ACTCTCGCAGGCTGACGTT         |
| F2                          | CCGAGTTTGTGGCCCTAGTA        |
| R2                          | AGCACGCCACCACATAG           |
| F3                          | ACGCCCGCCTACCTCTAC          |
| R3                          | CTTGGTCAGTTTCCCCCTTC        |

Supplemental data 3. Primers for sequence analysis of human and zebrafish FKRP gene
